# Supplementary material
Source: ML conference proceedings conference paper supplement (https://proceedings.neurips.cc/paper_files/paper/2019/hash/6832a7b24bc06775d02b7406880b93fc-Abstract.html)
Supplement: Supplementary file [file 6832a7b24bc06775d02b7406880b93fc-Supplemental.zip]

Table 2: Information of benchmark datasets.

| Dataset    | Datasize | $d$ | Source         |
|------------|----------|-----|----------------|
| housing    | 404      | 13  | UCI Repository |
| airfoil    | 1202     | 5   | UCI Repository |
| concrete   | 824      | 8   | UCI Repository |
| powerplant | 7654     | 4   | UCI Repository |
| mpg        | 313      | 7   | UCI Repository |
| redwine    | 1279     | 11  | UCI Repository |
| whitewine  | 3918     | 11  | UCI Repository |
| abalone    | 3341     | 10  | UCI Repository |
| diabetes   | 353      | 10  | [10]           |

## A Experiments details

In this appendix, we explain the detailed setting of experiments. First, we describe the procedure of hyper-parameter tuning during the experiments. Then, we provide detailed information on benchmark datasets.

### A.1 Procedure of hyper-parameter tuning

To construct risk  $\hat{R}_{\text{RA}}$ , we need to tune  $\lambda, w_1, w_2$ , which is done by minimizing empirically approximated  $\text{Err}(w_1, w_2)$  defined in (8). Let  $\bar{y}, \underline{y}$  be the 0.99-quantile and 0.01-quantile of  $F_Y$ , respectively. Note that we can calculate these quantities since we have access to  $f_Y$ . Then, we define  $\{y^{(i)}\}_{i=1}^{n_{\text{split}}+1}$  as  $y_i = \underline{y} + (i-1)/n_{\text{split}}(\bar{y} - \underline{y})$ , by which  $\text{Err}(w_1, w_2)$  is approximated as

$$\text{Err}(w_1, w_2) \simeq \sum_{i=1}^{n_{\text{split}}+1} f_Y(y_i) |y_i - w_1 F_Y(y_i) - w_2 (1 - F_Y(y_i))|.$$

We employ  $w_1, w_2$  that minimize the empirical approximation above with  $n_{\text{split}} = 1000$  and fix  $\lambda$  to be  $(w_1 + w_2)/2$  in all cases.

For the TT method, we employ hypothesis space  $\mathcal{H}' = \{h(\mathbf{x}) = F_Y^{-1}(\sigma(\boldsymbol{\theta}^\top \mathbf{x})) \mid \boldsymbol{\theta} \in \mathbb{R}^d\}$ , which is slightly different from hypothesis space of liner functions  $\mathcal{H} = \{h(\mathbf{x}) = \boldsymbol{\theta}^\top \mathbf{x} \mid \boldsymbol{\theta} \in \mathbb{R}^d\}$ , where  $\sigma$  is logistic function  $\sigma(x) = 1/(1 + \exp(-x))$ . This simplifies the loss function and reduces the computational time. We fix  $\lambda = 1/2$  for this risk, which yields the loss

$$\begin{aligned} \hat{R}_{\text{TT}}(h) = & \mathfrak{C} - \frac{1}{n_{\text{U}}} \sum_{\mathbf{x}_i \in \mathcal{D}_{\text{U}}} \left( \frac{1}{2} - \sigma(\boldsymbol{\theta}^\top \mathbf{x}_i) \right) \phi'(\sigma(h(\mathbf{x}_i))) + \phi(\sigma(\boldsymbol{\theta}^\top \mathbf{x}_i)) \\ & - \frac{1}{n_{\text{R}}} \sum_{(\mathbf{x}_i^+, \mathbf{x}_i^-) \in \mathcal{D}_{\text{R}}} \frac{1}{4} \phi'(\sigma(\boldsymbol{\theta}^\top \mathbf{x}_i^+)) - \frac{1}{4} \phi'(\sigma(\boldsymbol{\theta}^\top \mathbf{x}_i^-)). \end{aligned}$$

We minimize this loss with respect to  $\boldsymbol{\theta}$ .

### A.2 Benchmark dataset details

We use eight benchmark datasets from UCI repository [8] and one (diabetes) from Efron et al. [10]. The details of datasets can be found in Table 2. As preprocessing, we excluded all instances that contain missing values, and we encoded a categorical feature in abalone as a one-hot vector.

## B Estimating density function and cumulative distribution function

In this section, we discuss the case where the true probability density function  $f_Y$  is not given. In such a case, we need a slight modification of proposed methods since we have to estimate  $f_Y$  from the set of target values  $\mathcal{D}_Y = \{y_i\}_{i=1}^{n_Y}$ , where  $n_Y$  is the size of  $\mathcal{D}_Y$ . We first introduce a modification of the RA method and derive an estimation error bound for it. Then, we discuss the same for the TT method as well.

### B.1 Modification of the risk approximation method

Although  $\hat{R}_{\text{RA}}$  does not depend on  $f_Y$  or  $F_Y$ , we need the information of  $P_Y$  when tuning weights  $w_1, w_2$ , which is done by the minimization of  $\text{Err}$  defined in (8). Since,  $\text{Err}$  can not be directly calculated without  $f_Y$  and  $F_Y$ , we propose another quantity  $\widehat{\text{Err}}$  below, which substitute expectation over  $P_Y$  and CDF function  $F_Y$  to empirical mean and the empirical CDF.

$$\widehat{\text{Err}}(w_1, w_2) = \frac{1}{n_Y} \sum_{i=1}^{n_Y} |y_i - w_1 \hat{F}_Y(y_i) - w_2 (1 - \hat{F}_Y(y_i))|,$$

where  $\hat{F}_Y$  is the empirical CDF defined as

$$\hat{F}_Y(y) = \frac{1}{n_Y} \sum_{i=1}^{n_Y} \mathbb{1}[y_i \leq y].$$

Note that  $\widehat{\text{Err}}$  can be minimized given  $\mathcal{D}_Y$ . To show the validity of the method, we establish an estimation error bound involving  $\widehat{\text{Err}}$  as follows.

**Theorem 5.** *Let  $\mathcal{Y}$  be bounded in  $\mathcal{Y} \subseteq [-L, L]$ . Then, for all  $w_1, w_2 \in [-L, L]$ , we have*

$$|\text{Err}(w_1, w_2) - \widehat{\text{Err}}(w_1, w_2)| \leq O\left(\sqrt{\frac{\log \delta}{n_Y}}\right)$$

with probability  $1 - 2\delta$ .

*Proof.* Since the weights are bounded, from Mohri et al. [22, Thm. 10.3], we have

$$\text{Err}(w_1, w_2) \leq \frac{1}{n_Y} \sum_{i=1}^{n_Y} |y_i - w_1 F_Y(y_i) - w_2 (1 - F_Y(y_i))| + O\left(\sqrt{\frac{\log 1/\delta}{m}}\right),$$

with probability  $1 - \delta$ . Furthermore, from Dvoretzky-Kiefer-Wolfowitz inequality [20], we have

$$\|F_Y(y) - \hat{F}_Y(y)\|_\infty \leq \sqrt{\frac{\log(2/\delta)}{2n_Y}} \quad (11)$$

with probability  $1 - \delta$ , which yields

$$\frac{1}{n_Y} \sum_{i=1}^{n_Y} |y_i - w_1 F_Y(y_i) - w_2 (1 - F_Y(y_i))| \leq \widehat{\text{Err}} + O\left(\sqrt{\frac{\log 1/\delta}{m}}\right).$$

Therefore, from the union bound, we have

$$|\text{Err}(w_1, w_2) - \widehat{\text{Err}}(w_1, w_2)| \leq O\left(\sqrt{\frac{\log \delta}{n_Y}}\right)$$

with probability  $1 - 2\delta$ . □

From Theorems 2 and 5, we have

$$R(\hat{h}_{\text{RA}}) \leq R(h^*) + O\left(\sqrt{\frac{\log 1/\delta}{n_U}}\right) + O\left(\sqrt{\frac{\log 1/\delta}{n_R}}\right) + O\left(\sqrt{\frac{\log 1/\delta}{n_Y}}\right) + M\widehat{\text{Err}}(w_1, w_2),$$

with probability  $1 - 5\delta$  under the conditions given in these theorems.

## B.2 Modification on the target transformation method

Let  $\tilde{R}_{\text{TT}}$  be the risk which substitute  $F_Y$  in  $R_{\text{TT}}$  to empirical CDF, defined as

$$\begin{aligned}\tilde{R}_{\text{TT}}(h; \lambda) = & \mathfrak{C} - \frac{1}{n_U} \sum_{\mathbf{x}_i \in \mathcal{D}_U} \left( (\lambda - \hat{F}_Y(h(\mathbf{x}_i))) \phi'(\hat{F}_Y(h(\mathbf{x}_i))) + \phi(\hat{F}_Y(h(\mathbf{x}_i))) \right) \\ & - \frac{1}{n_R} \sum_{(\mathbf{x}_i^+, \mathbf{x}_i^-) \in \mathcal{D}_R} \left( \frac{1-\lambda}{2} \phi'(\hat{F}_Y(h(\mathbf{x}_i^+))) - \frac{\lambda}{2} \phi'(\hat{F}_Y(h(\mathbf{x}_i^-))) \right).\end{aligned}$$

Using (11), we have

$$|\hat{R}_{\text{TT}}(h) - \tilde{R}_{\text{TT}}(h)| \leq O \left( \sqrt{\frac{\log 1/\delta}{n_Y}} \right)$$

for all  $h \in \mathcal{H}$  with probability  $1 - \delta$ . Let  $\tilde{h}_{\text{TT}}$  be the minimizer of  $\tilde{R}_{\text{TT}}$  in hypothesis space  $\mathcal{H}$ . Then, under the condition given in Theorem 4, we have

$$R_{\text{TT}}(\tilde{h}_{\text{TT}}) \leq R_{\text{TT}}(h_{\text{TT}}) + O \left( \sqrt{\frac{\log 1/\delta}{n_Y}} \right) + O \left( \sqrt{\frac{\log 1/\delta}{n_R}} \right) + O \left( \sqrt{\frac{\log 1/\delta}{n_U}} \right),$$

with probability  $1 - 4\delta$ , therefore we have

$$R(\tilde{h}_{\text{TT}}) \leq R(h^*) + 2 \left( \frac{P}{p} \sigma \right)^2 + O \left( \sqrt{\frac{\log 1/\delta}{n_Y}} \right) + O \left( \sqrt{\frac{\log 1/\delta}{n_R}} \right) + O \left( \sqrt{\frac{\log 1/\delta}{n_U}} \right)$$

with probability  $1 - 4\delta$ , which can be shown by the slight modification of the proof of Theorem 4.

## C Proofs

### C.1 Proof of Lemma 1

Lemma 1 can be proved as follows.

*Proof of Lemma 1.* Let  $f_{\mathbf{X}^+}$  be the probability density function (PDF) of  $P_{\mathbf{X}^+}$ . From the definition of  $\mathbf{X}^+$ , we have

$$\begin{aligned}f_{\mathbf{X}^+}(\mathbf{x}) &= \frac{1}{Z} \iiint f_{\mathbf{X},Y}(\mathbf{x}, y) f_{\mathbf{X},Y}(\mathbf{x}', y') \mathbb{1}[y > y'] dy dy' d\mathbf{x}' \\ &= \frac{1}{Z} \int f_{\mathbf{X},Y}(\mathbf{x}, y) \left[ \int f_Y(y') \mathbb{1}[y > y'] dy' \right] dy \\ &= \frac{1}{Z} \int f_{\mathbf{X},Y}(\mathbf{x}, y) F_Y(y) dy,\end{aligned}$$

where  $Z$  is the normalizing constant and  $f_{\mathbf{X},Y}(y)$  is the PDF of  $P_{\mathbf{X},Y}$ . Now,  $Z$  is calculated as

$$\begin{aligned}Z &= \iint f_{\mathbf{X},Y}(\mathbf{x}, y) F_Y(y) dy d\mathbf{x} \\ &= \int f_Y(y) F_Y(y) dy \\ &= \frac{1}{2},\end{aligned}$$

where the last equality holds from the integration by parts. Therefore, we have

$$\begin{aligned}\mathbb{E}_{\mathbf{X}^+} [\phi'(\mathbf{X}^+)] &= \int f_{\mathbf{X}^+}(\mathbf{x}) \phi'(\mathbf{x}) d\mathbf{x} \\ &= \int 2 \left\{ \int f_{\mathbf{X},Y}(\mathbf{x}, y) F_Y(y) dy \right\} \phi'(\mathbf{x}) d\mathbf{x} \\ &= \mathbb{E}_{\mathbf{X},Y} [F_Y(Y) \phi'(\mathbf{x})].\end{aligned}$$

The expectation over  $P_{\mathbf{X}^-}$  can be derived in the same way.  $\square$

## C.2 Proof of Theorem 2

Here, we show the proof of Theorem 2. First, we show the gap between  $R$  and  $R_{\text{RA}}$  can be bounded as follows.

**Lemma 2.** *For all  $h \in \mathcal{H}$ , such that  $|\phi'(h(\mathbf{x}))| \leq M$  for all  $\mathbf{x} \in \mathcal{X}$ , we have*

$$|R(h) - R_{\text{RA}}(h; \lambda; w_1, w_2)| \leq M \text{Err}(w_1, w_2)$$

for all  $\lambda \in \mathbb{R}$ .

*Proof.* From Lemma 1 and the fact  $\mathbb{E}_{\mathbf{X}} [\phi'(\mathbf{X})] = \frac{1}{2} \mathbb{E}_{\mathbf{X}^+} [\phi'(\mathbf{X}^+)] + \frac{1}{2} \mathbb{E}_{\mathbf{X}^-} [\phi'(\mathbf{X}^-)]$ , we have

$$\begin{aligned} & |R(h) - R_{\text{RA}}(h; \lambda, w_1, w_2)| \\ &= |\mathbb{E}_{\mathbf{X}, Y} [Y \phi'(h(\mathbf{X}))] - w_1 \mathbb{E}_{\mathbf{X}^+} [\phi'(h(\mathbf{X}^+))] - w_2 \mathbb{E}_{\mathbf{X}^-} [\phi'(h(\mathbf{X}^-))]| \\ &= \left| \int f_{\mathbf{X}, Y}(\mathbf{x}, y) \phi'(h(\mathbf{x})) \{y - 2w_1 F_Y(y) - 2w_2(1 - F_Y(y))\} dy d\mathbf{x} \right| \\ &\leq \int f_{\mathbf{X}, Y}(\mathbf{x}, y) |\phi'(h(\mathbf{x}))| |y - 2w_1 F_Y(y) - 2w_2(1 - F_Y(y))| dy d\mathbf{x} \\ &\leq M \int f_Y(y) |y - 2w_1 F_Y(y) - 2w_2(1 - F_Y(y))| dy \\ &\leq M \text{Err}(w_1, w_2). \end{aligned}$$

□

Now, Theorem 2 can be derived as follows.

*Proof of Theorem 2.* Let  $\tilde{d}, \tilde{d}'$  be the pseudo-dimensions defined as

$$\begin{aligned} \tilde{d} &= \text{Pdim}(\{\mathbf{x} \rightarrow \phi'(h(\mathbf{x})) \mid h \in \mathcal{H}\}), \\ \tilde{d}' &= \text{Pdim}(\{\mathbf{x} \rightarrow h(\mathbf{x})\phi'(h(\mathbf{x})) - \phi(h(\mathbf{x})) \mid h \in \mathcal{H}\}), \end{aligned}$$

where  $\text{Pdim}(\mathcal{F})$  denotes the pseudo-dimension of the functional space  $\mathcal{F}$ . From the assumptions in Theorem 2, using the discussion in Mohri et al. [22, Theorem 10.6], each of following bound holds with probability  $1 - \delta$  for all  $h \in \mathcal{H}$ .

$$\begin{aligned} & \left| \mathbb{E}_{\mathbf{X}^+} [\phi'(h(\mathbf{X}^+))] - \frac{1}{n_{\text{R}}} \sum_{\mathbf{x}_i^+ \in \mathcal{D}_{\text{R}}^+} \phi'(h(\mathbf{x}_i^+)) \right| \leq M \sqrt{\frac{2\tilde{d} \log \frac{en_{\text{R}}}{d}}{n_{\text{R}}}} + M \sqrt{\frac{\log \frac{1}{\delta}}{2n_{\text{R}}}}, \\ & \left| \mathbb{E}_{\mathbf{X}^-} [\phi'(h(\mathbf{X}^-))] - \frac{1}{n_{\text{R}}} \sum_{\mathbf{x}_i^- \in \mathcal{D}_{\text{R}}^-} \phi'(h(\mathbf{x}_i^-)) \right| \leq M \sqrt{\frac{2\tilde{d} \log \frac{en_{\text{R}}}{d}}{n_{\text{R}}}} + M \sqrt{\frac{\log \frac{1}{\delta}}{2n_{\text{R}}}}, \\ & \left| \mathbb{E}_{\mathbf{X}} [g(\mathbf{X})] - \frac{1}{n_{\text{U}}} \sum_{\mathbf{x}_i \in \mathcal{D}_{\text{U}}^+} g(\mathbf{x}_i) \right| \leq m \sqrt{\frac{2\tilde{d}' \log \frac{en_{\text{U}}}{d'}}{n_{\text{U}}}} + m \sqrt{\frac{\log \frac{1}{\delta}}{2n_{\text{U}}}}, \end{aligned}$$

where  $g(\mathbf{x}) = h(\mathbf{x})\phi'(h(\mathbf{x})) + \phi(h(\mathbf{x}))$ . From the uniform bound, we have

$$\begin{aligned} & |R_{\text{RA}}(h; w_1, w_2) - \hat{R}_{\text{RA}}(h; \lambda, w_1, w_2)| \\ &\leq \left( \left| w_1 - \frac{\lambda}{2} \right| + \left| w_2 - \frac{\lambda}{2} \right| \right) \left( M \sqrt{\frac{2\tilde{d} \log \frac{en_{\text{R}}}{d}}{n_{\text{R}}}} + M \sqrt{\frac{\log \frac{1}{\delta}}{2n_{\text{R}}}} \right) \\ &\quad + (m + \lambda M) \left( \sqrt{\frac{2\tilde{d}' \log \frac{en_{\text{U}}}{d'}}{n_{\text{U}}}} + \sqrt{\frac{\log \frac{1}{\delta}}{2n_{\text{U}}}} \right) \end{aligned}$$

with probability  $1 - 3\delta$  for all  $h \in \mathcal{H}$ . Hence, with probability  $1 - 3\delta$ , we have

$$\begin{aligned}
& R(\hat{h}_{\text{RA}}) - R(h^*) \\
& \leq R_{\text{RA}}(\hat{h}_{\text{RA}}; \lambda, w_1, w_2) - R_{\text{RA}}(h^*; \lambda, w_1, w_2) + |R(h^*) - R_{\text{RA}}(h^*; \lambda, w_1, w_2)| \\
& \quad + |R(\hat{h}_{\text{RA}}) - R_{\text{RA}}(\hat{h}_{\text{RA}}; \lambda, w_1, w_2)| \\
& \leq (R_{\text{RA}}(\hat{h}_{\text{RA}}; \lambda, w_1, w_2) - \hat{R}_{\text{RA}}(h^*; \lambda, w_1, w_2)) \\
& \quad - (R_{\text{RA}}(h^*; \lambda, w_1, w_2) - \hat{R}_{\text{RA}}(h^*; \lambda, w_1, w_2)) + 2M\text{Err}(w_1, w_2) \\
& \leq (R_{\text{RA}}(\hat{h}_{\text{RA}}; \lambda, w_1, w_2) - \hat{R}_{\text{RA}}(\hat{h}_{\text{RA}}; \lambda, w_1, w_2)) \\
& \quad - (R_{\text{RA}}(h^*; \lambda, w_1, w_2) - \hat{R}_{\text{RA}}(h^*; \lambda, w_1, w_2)) + 2M\text{Err}(w_1, w_2) \\
& \leq O\left(\sqrt{\frac{\log 1/\delta}{n_{\text{U}}}}\right) + O\left(\sqrt{\frac{\log 1/\delta}{n_{\text{R}}}}\right) + 2M\text{Err}(w_1, w_2),
\end{aligned}$$

where the second inequality holds from the fact  $\hat{R}_{\text{RA}}(\hat{h}_{\text{RA}}; \lambda, w_1, w_2) \leq \hat{R}_{\text{RA}}(\hat{h}^*; \lambda, w_1, w_2)$  and Lemma 2.  $\square$

### C.3 Proof of Theorem 1

Theorem 1 can be shown as follows.

*Proof of Theorem 1.* The variance of  $\hat{R}_{\text{RA}}$  denoted as  $\text{Var} \left[ \hat{R}_{\text{RA}}(h; \lambda, w_1, w_2) \right]$  can be expressed as

$$\text{Var} \left[ \hat{R}_{\text{RA}}(h; \lambda, w_1, w_2) \right] = \left( w_1 - \frac{\lambda}{2} \right)^2 \frac{\sigma_+^2}{n_{\text{R}}} + \left( w_2 - \frac{\lambda}{2} \right)^2 \frac{\sigma_-^2}{n_{\text{R}}}$$

when  $n_{\text{U}} \rightarrow \infty$ . By solving the above quadratic optimization problem, we have

$$\arg \min_{\lambda} \text{Var} \left[ \hat{R}_{\text{RA}}(h; \lambda, w_1, w_2) \right] = \frac{2(w_1\sigma_+^2 + w_2\sigma_-^2)}{\sigma_+^2 + \sigma_-^2}.$$

$\square$

### C.4 Proof of Theorem 3

We can construct a simple example satisfies the conditions in Theorem 3 as follows.

*Proof.* Let  $f_{\mathbf{X},Y}, \tilde{f}_{\mathbf{X},Y}$  be the PDF of  $P_{\mathbf{X},Y}, \tilde{P}_{\mathbf{X},Y}$ , respectively. If we consider  $\mathcal{X} = [-1, 1]$  and  $\mathcal{Y} = [0, 4]$  and these PDF to be

$$\begin{aligned}
f_{\mathbf{X},Y}(x, y) &= \begin{cases} \frac{1}{6} & (y \in [0, 2] \cup [3, 4]), \\ 0 & (\text{otherwise}), \end{cases} \\
\tilde{f}_{\mathbf{X},Y}(x, y) &= \begin{cases} \frac{1}{8} & (x \in [-1, 0), y \in [0, 1]), \\ \frac{1}{4} & (x \in [-1, 0), y \in [1, 2]), \\ \frac{1}{8} & (x \in [-1, 0), y \in [3, 4]), \\ \frac{5}{24} & (x \in [0, 1], y \in [0, 1]), \\ \frac{1}{12} & (x \in [0, 1], y \in [1, 2]), \\ \frac{5}{24} & (x \in [0, 1], y \in [3, 4]), \\ 0 & (\text{otherwise}). \end{cases}
\end{aligned}$$

Then, by the simple calculation, we can see that they have the same PDF  $f_{\mathbf{X}}(x), f_Y(y), f_{\mathbf{X}^+, \mathbf{X}^-}(x^+, x^-)$ , each represents the PDF of  $P_{\mathbf{X}}, P_Y, P_{\mathbf{X}^+, \mathbf{X}^-}$ , respectively, which are

$$\begin{aligned}
f_{\mathbf{X}}(x) &= 0.5, \\
f_Y(y) &= \begin{cases} \frac{1}{3} & (y \in [0, 2] \cup [3, 4]), \\ 0 & (\text{otherwise}), \end{cases} \\
f_{\mathbf{X}^+, \mathbf{X}^-}(x^+, x^-) &= 0.25.
\end{aligned}$$

However, the conditional expectation  $\mathbb{E}_{Y|\mathbf{X}=x}[Y]$  defined on  $P_{\mathbf{X},Y}$  is

$$\mathbb{E}_{Y|\mathbf{X}=x}[Y] = \frac{11}{6},$$

while the conditional expectation  $\tilde{\mathbb{E}}_{Y|\mathbf{X}=x}[Y]$  defined on  $\tilde{P}_{\mathbf{X},Y}$  is

$$\tilde{\mathbb{E}}_{Y|\mathbf{X}=x}[Y] = \begin{cases} \frac{7}{4} & (x \in [-1, 0)), \\ \frac{23}{12} & (x \in [0, 1]). \end{cases}$$

□

### C.5 Proof of Theorem 4

The Theorem 4 can be shown as follows.

*Proof of Theorem 4.* We first show that under the conditions, we have

$$\|h_{\text{true}}(\mathbf{x}) - h_{\text{TT}}(\mathbf{x})\|_{\infty} \leq \frac{\sigma P}{p}.$$

Since  $(F_Y(y))' = f_Y(y) \leq P$  and  $(F_Y^{-1}(q))' = 1/f_Y(F^{-1}(q)) \leq 1/p$  for any  $y \in \mathcal{Y}$  and  $q \in [0, 1]$ ,  $F_Y(y), F_Y^{-1}(q)$  are  $P, 1/p$ -Lipschitz continuous, respectively. Therefore, we have

$$\begin{aligned} h_{\text{TT}}(\mathbf{x}) &= F_Y^{-1}(\mathbb{E}_{Y|\mathbf{X}=\mathbf{x}}[F_Y(Y)]) \\ &= F_Y^{-1}(\mathbb{E}_{\epsilon}[F_Y(h_{\text{true}}(\mathbf{x}) + \epsilon)]) \\ &\leq F_Y^{-1}(F_Y(h_{\text{true}}(\mathbf{x}) + \sigma P)) \\ &\leq h_{\text{true}}(\mathbf{x}) + \frac{\sigma P}{p} \end{aligned}$$

for all  $\mathbf{x} \in \mathcal{X}$ . With the same discussion, we have  $|h_{\text{TT}}(\mathbf{x}) - h_{\text{true}}(\mathbf{x})| \leq \frac{\sigma P}{p}$ . Therefore, we have

$$\|h_{\text{true}}(\mathbf{x}) - h_{\text{TT}}(\mathbf{x})\|_{\infty} \leq \frac{\sigma P}{p}.$$

Now, if  $\phi(x) = x^2$ , which means  $R(h) = \mathbb{E}_{\mathbf{X},Y}[(h(\mathbf{X}) - Y)^2]$ , we have

$$\begin{aligned} R(\hat{h}_{\text{TT}}) &= \mathbb{E}_{\mathbf{X},Y}[(\hat{h}_{\text{TT}}(\mathbf{x}) - Y)^2] \\ &= \mathbb{E}_{\mathbf{X},Y}[(\hat{h}_{\text{TT}}(\mathbf{x}) - \hat{h}_{\text{true}}(\mathbf{x}) + \hat{h}_{\text{true}}(\mathbf{x}) - Y)^2] \\ &= \mathbb{E}_{\mathbf{X}}[(\hat{h}_{\text{TT}}(\mathbf{x}) - \hat{h}_{\text{true}}(\mathbf{x}))^2] + \mathbb{E}_{\mathbf{X},Y}[(\hat{h}_{\text{true}}(\mathbf{x}) - Y)^2] \\ &\quad + 2\mathbb{E}_{\mathbf{X},Y}[(\hat{h}_{\text{TT}}(\mathbf{x}) - \hat{h}_{\text{true}}(\mathbf{x}))(\hat{h}_{\text{true}}(\mathbf{x}) - Y)] \\ &= \mathbb{E}_{\mathbf{X}}[(\hat{h}_{\text{TT}}(\mathbf{X}) - \hat{h}_{\text{true}}(\mathbf{X}))^2] + \mathbb{E}_{\mathbf{X},Y}[(h_{\text{true}}(\mathbf{X}) - Y)^2] \\ &\leq R(h_{\text{true}}) + 2\mathbb{E}_{\mathbf{X}}[(\hat{h}_{\text{TT}}(\mathbf{x}) - h_{\text{TT}}(\mathbf{x}))^2] + 2\mathbb{E}_{\mathbf{X}}[(h_{\text{true}}(\mathbf{x}) - h_{\text{TT}}(\mathbf{x}))^2]. \end{aligned}$$

Since  $\|h_{\text{TT}}(\mathbf{x}) - h_{\text{true}}(\mathbf{x})\|_{\infty} \leq \frac{\sigma P}{p}$ , we have

$$\mathbb{E}_{\mathbf{X}}[(h_{\text{true}}(\mathbf{X}) - h_{\text{TT}}(\mathbf{X}))^2] \leq \left(\frac{\sigma P}{p}\right)^2.$$

Furthermore, using the characteristic of expectation, if  $\phi(x) = x^2$ , which means  $R_{\text{TT}}(h) = \mathbb{E}_{\mathbf{X},Y}[(F_Y(h(\mathbf{X})) - F_Y(Y))^2]$ , we have

$$\begin{aligned} R_{\text{TT}}(\hat{h}_{\text{TT}}) &= \mathbb{E}_{\mathbf{X},Y}[(F_Y(\hat{h}_{\text{TT}}(\mathbf{X})) - F_Y(Y))^2] \\ &= \mathbb{E}_{\mathbf{X},Y}[(F_Y(\hat{h}_{\text{TT}}(\mathbf{X})) - F_Y(h_{\text{TT}}(\mathbf{X})))^2] + \mathbb{E}_{\mathbf{X},Y}[(F_Y(Y) - F_Y(h_{\text{TT}}(\mathbf{X})))^2] \\ &= \mathbb{E}_{\mathbf{X},Y}[(F_Y(\hat{h}_{\text{TT}}(\mathbf{X})) - F_Y(h_{\text{TT}}(\mathbf{X})))^2] + R_{\text{TT}}(h_{\text{TT}}). \end{aligned}$$

Since  $(F_Y(y))' \geq p$ , we have

$$\begin{aligned}\mathbb{E}_{\mathbf{X}} \left[ (\hat{h}_{\text{TT}}(\mathbf{X}) - h_{\text{TT}}(\mathbf{X}))^2 \right] &\leq \frac{1}{p^2} \mathbb{E}_{\mathbf{X}, Y} \left[ (F_Y(\hat{h}_{\text{TT}}(\mathbf{X})) - F_Y(h_{\text{TT}}(\mathbf{X})))^2 \right] \\ &= \frac{1}{p^2} \left( R_{\text{TT}}(\hat{h}_{\text{TT}}) - R_{\text{TT}}(h_{\text{TT}}) \right) \\ &\leq O \left( \sqrt{\frac{\log 1/\delta}{n_{\text{U}}}} \right) + O \left( \sqrt{\frac{\log 1/\delta}{n_{\text{R}}}} \right)\end{aligned}$$

with probability  $1 - 3\delta$ , where the last inequality holds from the same discussion as in Theorem 2. Note that  $|\phi'(F_Y(h(\mathbf{x})))|$ ,  $|F_Y(h(\mathbf{x}))\phi'(F_Y(h(\mathbf{x}))) - \phi(F_Y(h(\mathbf{x})))|$  are bounded since  $F_Y(h(\mathbf{x})) \in [0, 1]$  by definition. Combining these inequalities, we can see that

$$R(\hat{h}_{\text{TT}}) \leq R(h_{\text{true}}(\mathbf{x})) + 2 \left( \frac{\sigma P}{p} \right)^2 + O \left( \sqrt{\frac{\log 1/\delta}{n_{\text{U}}}} \right) + O \left( \sqrt{\frac{\log 1/\delta}{n_{\text{R}}}} \right)$$

with probability  $1 - 3\delta$ . □
